# Supplementary material for: Self-reported symptoms of arm lymphedema and health-related quality of life among female breast cancer survivors
Source: PubMed Central journal article supplement (PMC8139966; doi:10.1038/s41598-021-89055-0), 2021-05-21
Supplement: 41598_2021_89055_MOESM1_ESM.pdf [file 41598_2021_89055_MOESM1_ESM.pdf]

### Supplementary Table. Lymphedema and health-related quality of life measures

Adjusted means and standard errors are presented for the SF-36 physical and mental component summary scores and perceived stress scale. Medians and interquartile ranges are presented for the other health-related quality of life measures. *P* values for F statistics from the analysis of covariance in 499 women and *P* values from the analysis of symptom score in 137 women who self-reported lymphedema are presented.

| Quality of life measure<br>(score range) <sup>a</sup>   | No lymphedema<br>Adjusted mean (SE)/<br>Median (IQR) | Lymphedema<br>symptom-free<br>Adjusted mean (SE)/<br>Median (IQR) | 1+ lymphedema<br>symptoms<br>Adjusted mean (SE)/<br>Median (IQR) | <i>P</i> -value | <i>P</i> -value for<br>trend test <sup>d</sup> |
|---------------------------------------------------------|------------------------------------------------------|-------------------------------------------------------------------|------------------------------------------------------------------|-----------------|------------------------------------------------|
|                                                         | N=362                                                | N=40                                                              | N=97                                                             |                 |                                                |
| MOS SF-36 PCS <sup>b</sup> (0-100)                      | 49.3 (0.8)                                           | 44.9 (1.7) <sup>h</sup>                                           | 44.1 (1.2) <sup>g</sup>                                          | <0.0001         | 0.001                                          |
| MOS SF-36 MCS <sup>b</sup> (0-100)                      | 48.9 (0.8)                                           | 46.5 (1.7)                                                        | 47.8 (1.2)                                                       | 0.31            | 0.24                                           |
| MOS SF-36 Subscales <sup>c</sup> (0-100)                |                                                      |                                                                   |                                                                  |                 |                                                |
| Physical Functioning                                    | 52.5 (45.5-54.8)                                     | 50.2 (39.7-54.8)                                                  | 45.5 (33.8-52.5) <sup>g</sup>                                    | <0.0001         | <0.0001                                        |
| Role-Physical                                           | 56.2 (42.1-56.2)                                     | 42.1 (28.0-56.2) <sup>h</sup>                                     | 49.2 (35.0-56.2) <sup>g</sup>                                    | 0.001           | 0.07                                           |
| Bodily Pain                                             | 55.9 (46.5-62.7)                                     | 50.8 (37.5-55.9) <sup>h</sup>                                     | 46.5 (37.5-55.9) <sup>g</sup>                                    | <0.0001         | 0.07                                           |
| General Health                                          | 53.2 (46.2-57.9)                                     | 50.9 (41.5-56.7)                                                  | 50.9 (41.5-55.6) <sup>g</sup>                                    | 0.01            | 0.07                                           |
| Vitality                                                | 51.4 (44.3-58.5)                                     | 46.7 (38.4-53.8)                                                  | 49.1 (42.0-56.2)                                                 | 0.10            | 0.30                                           |
| Social Functioning                                      | 57.1 (46.3-57.1)                                     | 46.3 (38.1-57.1) <sup>h</sup>                                     | 51.7 (35.4-57.1)                                                 | 0.005           | 0.23                                           |
| Role-Emotional                                          | 55.3 (44.8-55.3)                                     | 55.3 (23.7-55.3)                                                  | 55.3 (34.3-55.3)                                                 | 0.17            | 0.31                                           |
| Mental Health                                           | 52.7 (43.6-57.3)                                     | 50.4 (42.5-56.1)                                                  | 50.4 (43.6-57.3)                                                 | 0.45            | 0.75                                           |
| Perceived Stress Scale <sup>b,c</sup> (0-16)            | 8.9 (0.2)                                            | 9.1 (0.5)                                                         | 9.3 (0.4)                                                        | 0.56            | 0.01                                           |
| Fear of Recurrence Scale <sup>d</sup> (5-25)            | 16.0 (13.0-19.0)                                     | 17.5 (14.0-21.0)                                                  | 17.0 (14.0-20.0)                                                 | 0.14            | 0.79                                           |
| Wesley Clinical Lymphedema Scale <sup>e,f</sup> (0-100) | -                                                    | 100 (97.1-100)                                                    | 91.4 (77.1-97.1)                                                 | <0.0001         | <0.0001                                        |
|                                                         | N=207                                                | N=25                                                              | N=56                                                             |                 |                                                |
| Sexual Functioning Summary Scale <sup>e,e</sup> (0-12)  | 3.0 (1.0-6.0)                                        | 5.0 (0.0-8.0)                                                     | 2.5 (1.0-7.0)                                                    | 0.74            | 0.43                                           |

Abbreviation. IQR: interquartile range; MCS: mental component summary; MOS SF-36: Medical outcomes study 36-item short form health survey; N: number; PCS: physical component summary; SE: standard error

<sup>a</sup> A higher score indicates better health-related quality of life in MOS scales and Wesley Clinical Lymphedema Scale and worse health-related quality of life in other scales.

<sup>b</sup> Standard analysis of covariance model adjusting for age at 40-month assessment and race/ethnicity was used.

<sup>c</sup> A higher score indicates greater perceived stress.

<sup>d</sup> Rank-based analysis of covariance model adjusting for age at 40-month assessment and race/ethnicity was used.

<sup>e</sup> Only 137 women who reported lymphedema were included in the analysis of symptom score adjusting for age at 40-month assessment and race/ethnicity.

<sup>f</sup> Only 288 women who reported being sexually active during the past 6 months prior to 40-month assessment were included.

<sup>g</sup> Scheffé's pair-wise multiple comparison test detected a statistically significant difference between women without lymphedema and women with at least one symptom.

<sup>h</sup> Scheffé's pair-wise multiple comparison test detected a statistically significant difference between women without lymphedema and women with lymphedema and no symptom.
